# Supplementary material for: The prevalence of cardiac autonomic neuropathy in prediabetes: a systematic review
Source: Springer Nature journal article supplement (doi:10.1007/s00125-020-05316-z), 2020-11-09
Supplement: MOESM1 [file 18568114]

## Extended Supplementary Material

ESM Table 1. CAN study characteristics and prevalence in the metabolic syndrome in final selected articles

| Author                       | Country | Sample Size | Study group        | Group Size | Mean Age (years +/- SD or range) | Sex (Female/Male) | Number of AFTs used for diagnosis (1 or ≥2) | AFT tests                                                                                             | Number of Subjects with CAN | Prevalence (%) |
|------------------------------|---------|-------------|--------------------|------------|----------------------------------|-------------------|---------------------------------------------|-------------------------------------------------------------------------------------------------------|-----------------------------|----------------|
| Kseneva et al [47]           | Russia  | 135         | Metabolic Syndrome | 135        | 49.7±0.8                         | 105/30            | 1                                           | HRV during orthostatic test                                                                           | 33                          | 24.4           |
| Rasic-Milutinovic et al [46] | Serbia  | 49          | Metabolic Syndrome | 15         | 57.63±7                          | 9/6               | ≥2                                          | Hand grip test;                                                                                       | 6                           | 42.9           |
|                              |         |             | NGT                | 15         | 55 a                             | a                 |                                             | orthostatic hypotension;                                                                              | a                           | a              |
|                              |         |             | (T2)DM             | 17         | 55.36±4.64                       | 10/7              |                                             | HRV during deep breathing including E/I ratio; max/min 30/15; ratio to standing up and Valsalva ratio | 8                           | 46.2           |

ESM Table 2. Metabolic characteristics of CAN studies in the metabolic syndrome in final selected articles

| Author                       | Study group        | FPG (mmol/L ±SD OR range) | OGTT (mmol/L ±SD OR range) | HbA1C % (mmol/mol)                       | BP Systolic (mmHg ±SD OR range) | BP Diastolic (mmHg ±SD OR range) | Triglycerides (mmol/L ±SD OR range) | Cholesterol (mmol/L ±SD OR range) | BMI (kg/m <sup>2</sup> ±SD OR range) |
|------------------------------|--------------------|---------------------------|----------------------------|------------------------------------------|---------------------------------|----------------------------------|-------------------------------------|-----------------------------------|--------------------------------------|
| Kseneva et al [47]           | Metabolic Syndrome | a                         | a                          | a                                        | a                               | a                                | a                                   | a                                 | a                                    |
| Rasic-Milutinovic et al [46] | Metabolic Syndrome | 6.02±0.54                 | a                          | 6.10 <sup>b</sup><br>(43.2)              | 128.43±16.35                    | 78.47±8.42                       | 3.25±1.35                           | 6.54±0.74                         | 28.59±0.75                           |
|                              | NGT                | 5.02±0.54                 | a                          | 4.90 <sup>b</sup><br>(30.1) <sup>b</sup> | 125.43±18.46                    | 76.57±5.76                       | 1.15±0.90                           | 5.94±0.74                         | 26.59±1.64                           |
|                              | (T2)DM             | 6.69±1.14                 | a                          | 7.20 <sup>b</sup><br>(55.2)              | 129.23±15.52                    | 79.08±12.13                      | 2.13±0.59                           | 5.40±0.79                         | 27.77±2.9                            |

Abbreviations: NGT (normal glucose tolerance); DM (Diabetes mellitus); (T2)DM (type 2 Diabetes mellitus)

a: Information are NA, b: Only mean values were available.

Abbreviations: FPG (fasting plasma glucose); NGT (normal glucose tolerance); DM (Diabetes mellitus); (T2)DM (type 2 Diabetes mellitus)

Rasic- Milutinovic et al [46] – HbA1c dispersion data (SD or range) are unavailable.

ESM Table 3. Definition of abnormal AFT

| Author               | AFT tests                                                                                                  | Definition of abnormal AFT                                                                                                                                                                                                                                                                                                                                                                                  |
|----------------------|------------------------------------------------------------------------------------------------------------|-------------------------------------------------------------------------------------------------------------------------------------------------------------------------------------------------------------------------------------------------------------------------------------------------------------------------------------------------------------------------------------------------------------|
| Ziegler et al [25]   | Linear HRV analysis (time and frequency domain) and nonlinear HRV analysis derived from nonlinear dynamics | Abnormal indices: <5th or >95th percentile                                                                                                                                                                                                                                                                                                                                                                  |
| Dimova et al[41]     | ANX- 3.0 and Ewing tests®: deep breathing challenge, Valsalva challenge, and stand-up challenge.           | ANX- 3.0 method that computes sympathetic and parasympathetic activity non-invasively, separately and simultaneously based on cardio-respiratory synchronization at rest. There is no universal reference value as ANSAR system uses individual age-based low “cut-off” values above which sympathetic and parasympathetic response during a particular test is normal for the particular examined patient. |
| Laitinen et al [38]  | Deep-breathing test; Active orthostatic test; Expiration/Inspiration (E/I) ratio                           | Parasympathetic dysfunction was classified as an E/I ratio of $\leq 1.10$ . Sympathetic dysfunction was assessed as decrease of systolic blood pressure $\geq 20$ mmHg during standing)                                                                                                                                                                                                                     |
| Wu et al [42]        | Orthostatic hypotension<br>Blood pressure and heart rate variability after standing                        | Orthostatic hypotension was defined as a decline in systolic blood pressure of at least 20 mmHg and/or a decline in diastolic blood pressure of at least 10 mmHg after either 1 or 3 min of standing after an individual changed from a supine to a standing position<br><br>HRV after standing not defined                                                                                                 |
| Zimmerman et al [40] | Expiration/inspiration ratio (E/I)                                                                         | The 2004 NGT group was chosen as reference, with a mean E/I ratio of 1.27 (95% CI 1.21–1.32). An E/I ratio of <1.5 SD of the mean for the NGT group was considered abnormal                                                                                                                                                                                                                                 |

|                      |                                                                                                                                                                                                                           |                                                                                                                                                                                                                                                                                                                                                                                                                                                                                   |
|----------------------|---------------------------------------------------------------------------------------------------------------------------------------------------------------------------------------------------------------------------|-----------------------------------------------------------------------------------------------------------------------------------------------------------------------------------------------------------------------------------------------------------------------------------------------------------------------------------------------------------------------------------------------------------------------------------------------------------------------------------|
| Callaghan et al [44] | Expiration / Inspiration (E/ I)                                                                                                                                                                                           | Abnormal E-to-I ratio: <5 <sup>th</sup> percentile cut-off of lean control subjects                                                                                                                                                                                                                                                                                                                                                                                               |
| Dimova et al [36]    | HRV at rest and during deep breathing, Valsalva challenge, standing challenge                                                                                                                                             | Not defined but states 'at least two abnormal autonomic tests.'                                                                                                                                                                                                                                                                                                                                                                                                                   |
| Balbinot et al [43]  | HRV tests comprised three spectral indices (in the frequency domain) and four Ewing tests; including the Valsalva manoeuvre, orthostatic test, deep breathing test, and orthostatic hypotension test.                     | Heart rate variability tests were performed. These tests comprised three spectral indices (in the frequency domain) and four Ewing tests (35), including the Valsalva manoeuvre, orthostatic test, deep breathing test, and orthostatic hypotension test. The electrocardiogram was recorded (particularly the QRS complex) using electrocardiography equipment (Neurosoft®, Ivanovo, Russia) and software that was created for heart rate variability analysis (Poly-Spectrum®). |
| Dinh et al [37]      | HRV at rest; spectral power in the very low-frequency band; spectral power in the low-frequency band; HRV during deep breathing; maximum/ minimum 30:15 ratio; Valsalva ratio; postural change in systolic blood pressure | Normal ranges defined previously by Agelink et al based on age and gender [76]                                                                                                                                                                                                                                                                                                                                                                                                    |
| Putz et al [39]      | HRV during deep breathing, standing (30/15 ratio) and Valsalva manoeuvre (Valsalva ratio), as well as blood pressure response to standing and sustained handgrip.                                                         | Heart rate variability was characterized by the triangular index that is a time domain measure of heart rate variability. It is calculated by a conversion of the RR intervals into a geometric pattern and by dividing the integral of the density distribution with the maximum of the density distribution.                                                                                                                                                                    |
| Kamel et al [45]     | HRV response to Valsalva manoeuvre Heart-rate variation during deep breathing. Blood pressure response                                                                                                                    | Using previously defined reference values, the results of the AFT were categorized into one of four groups: normal; possible parasympathetic damage, with results of one of the three tests of parasympathetic function                                                                                                                                                                                                                                                           |

to standing.

Blood pressure response to sustained handgrip was performed by first determining the maximum voluntary contraction using a handgrip dynamometer.

abnormal; definite parasympathetic damage, with results of at least two of the tests of parasympathetic function abnormal; and combined parasympathetic and sympathetic damage, where changes were seen in both arms of testing [77].

ESM Table 4. Critical Appraisal table for assessment of final selected articles

|                                                                                    | Callaghan<br>et al<br>2020 [44] | Dimova<br>2017<br>[36] | Dimova<br>et al<br>2020<br>[41] | Dihn<br>2011<br>[37] | Putz<br>2013<br>[39] | Wu<br>2009<br>[42] | Balbinot<br>2012<br>[43] | Kamel<br>2014<br>[45] | Laitinen<br>2011<br>[38] | Zimmerman<br>2018 [40] | Ziegler 2015 [25] |
|------------------------------------------------------------------------------------|---------------------------------|------------------------|---------------------------------|----------------------|----------------------|--------------------|--------------------------|-----------------------|--------------------------|------------------------|-------------------|
| Was the sample representative of the target population?                            | 0                               | 0                      | 0                               | 1                    | 0                    | 0                  | 1                        | 0                     | 0                        | 0                      | 0                 |
| Were study participants recruited in an appropriate way?                           | 0                               | 1                      | 0                               | 1                    | 1                    | 0                  | 1                        | 1                     | 1                        | 0                      | 0                 |
| Was the sample size adequate?                                                      | 1                               | 0                      | 1                               | 1                    | 1                    | 0                  | 1                        | 1                     | 0                        | 1                      | 0                 |
| Were the study subjects and settings described in detail?                          | 0                               | 0                      | 0                               | 0                    | 0                    | 0                  | 0                        | 0                     | 0                        | 0                      | 0                 |
| Was the data analysis conducted with sufficient coverage of the identified sample? | 0                               | 0                      | 0                               | 0                    | 0                    | 0                  | 0                        | 0                     | 0                        | 0                      | 0                 |
| Were valid methods used for the identification of the condition?                   | 1                               | 0                      | 0                               | 0                    | 0                    | 0                  | 0                        | 0                     | 0                        | 0                      | 0                 |
| Was the condition measured in a standard, reliable way for all participants?       | 0                               | 0                      | 0                               | 0                    | 0                    | 1                  | 0                        | 0                     | 0                        | 0                      | 0                 |



ESM Figure. 1. Funnel plot displaying all final selected studies used to establish possible bias

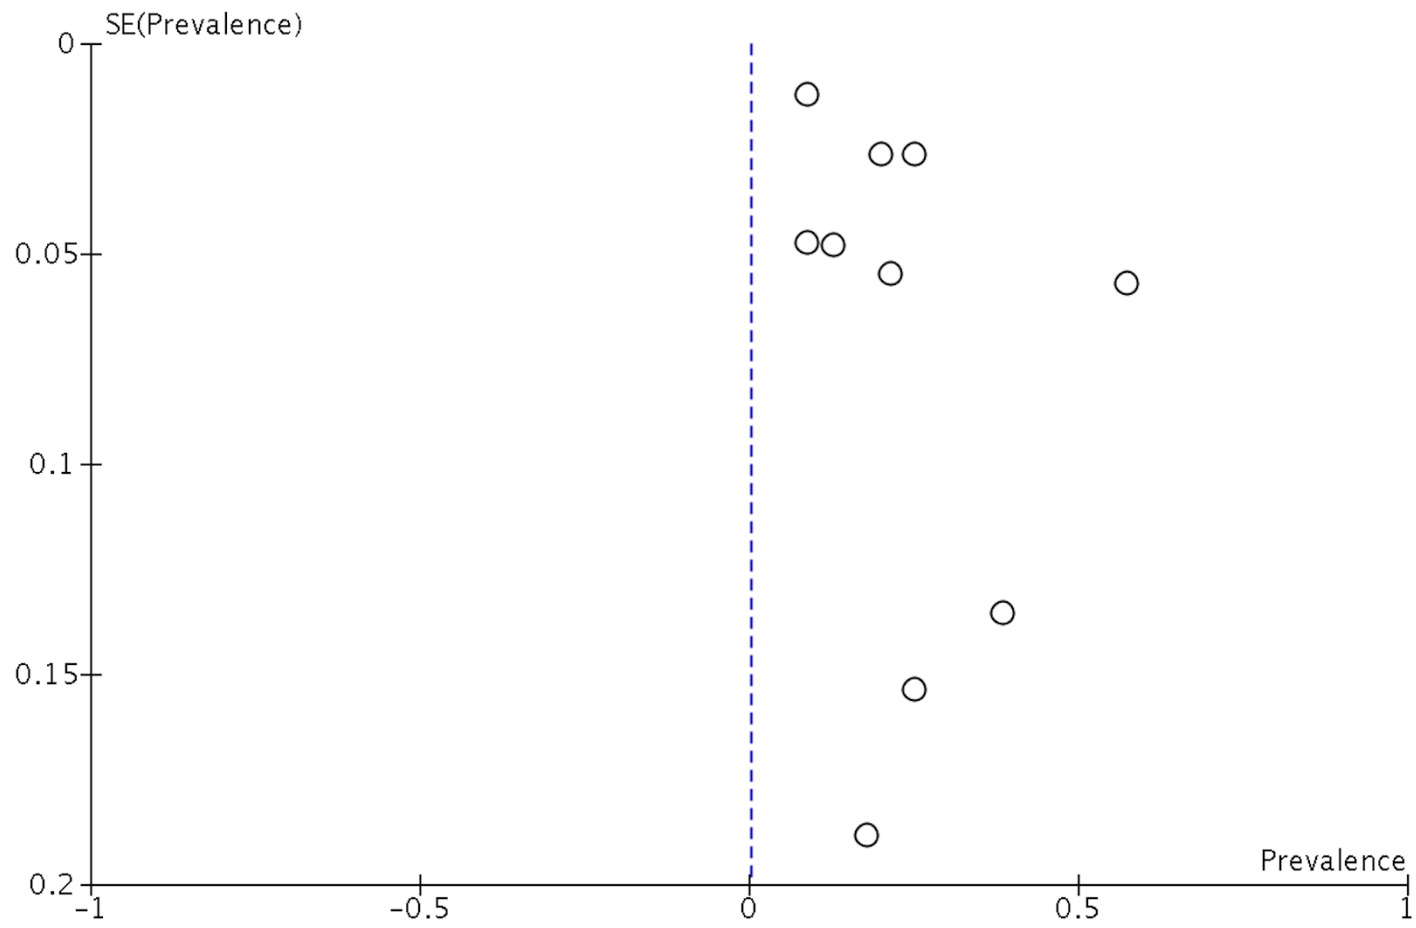



ESM Figure. 2. Forest plots of CAN Prevalence (Expressed as a Proportion) in prediabetes studies a)  $\geq 2$  AFT positive studies B) 1AFT positive studies.

A.  $\geq 2$  AFT positive studies

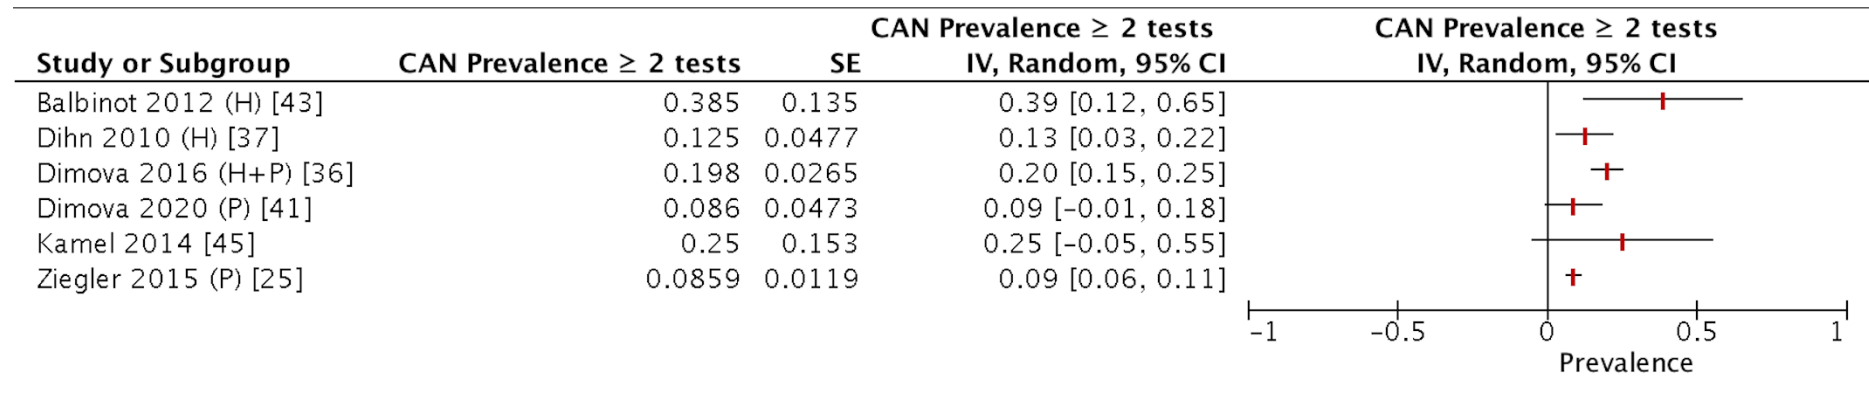

B. 1 AFT positive studies.

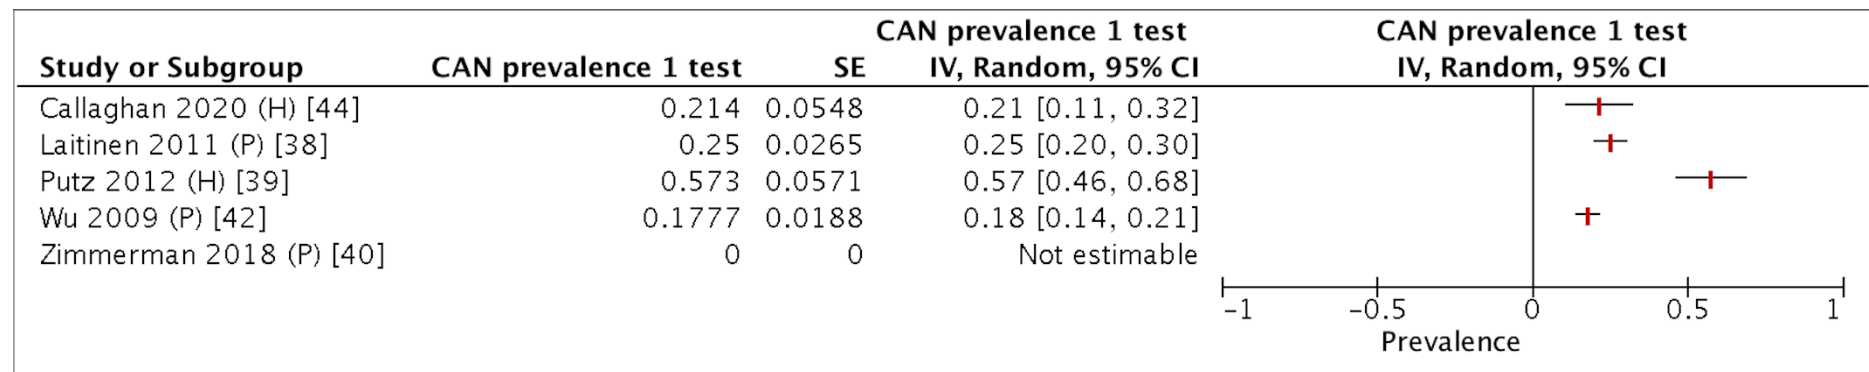

H = Hospital-based, P = Population/Primary Care-based, H+P = Both hospital and primary care based.

\*For two studies (Bablinot 2012 and Kamel 2014) with sample sizes of  $\leq 13$  and  $\leq 5$  people with CAN, the 95% confidence intervals around the prevalence estimate were wide and the lower bound of the confidence interval was estimated to be less than 0. This is due to the small numbers used in the estimation

of prevalence and the standard error (SE) of prevalence (where  $SE = \text{square root } [p(1-p)/n]$ , where  $p$  is the prevalence of CAN as a proportion and  $n$  is the total number of people in the study or study group), and the uncertainty of the SE is reflected within the wide confidence intervals. The lower bounds of these negative confidence intervals should be considered to be 0.

ESM Figure. 3. Forest plot showing CAN prevalence in NGT studies

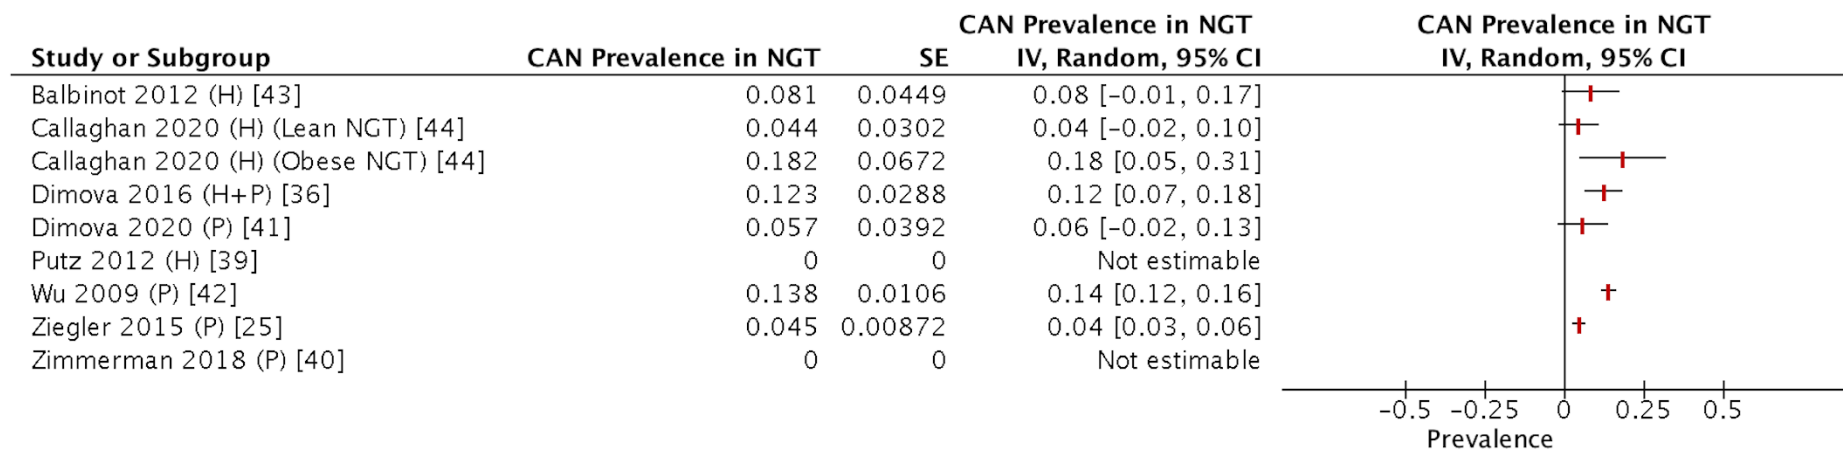

H = Hospital-based, P = Population/Primary Care-based, H+P = Both hospital and primary care based.

\*For three studies Bablinot 2012, Callaghan 2020 and Dimova 2020, the 95% confidence intervals around the prevalence estimate were wide and the lower bound of the confidence interval was estimated to be less than 0. This is due to the small numbers used in the estimation of prevalence and the standard error (SE) of prevalence (where  $SE = \text{square root } [p(1-p)/n]$ , where p is the prevalence of CAN as a proportion and n is the total number of people in the study or study group), and the uncertainty of the SE is reflected within the wide confidence intervals. The lower bounds of these negative confidence intervals should be considered to be 0.

ESM Figure. 4. Forest plot showing CAN prevalence in DM studies

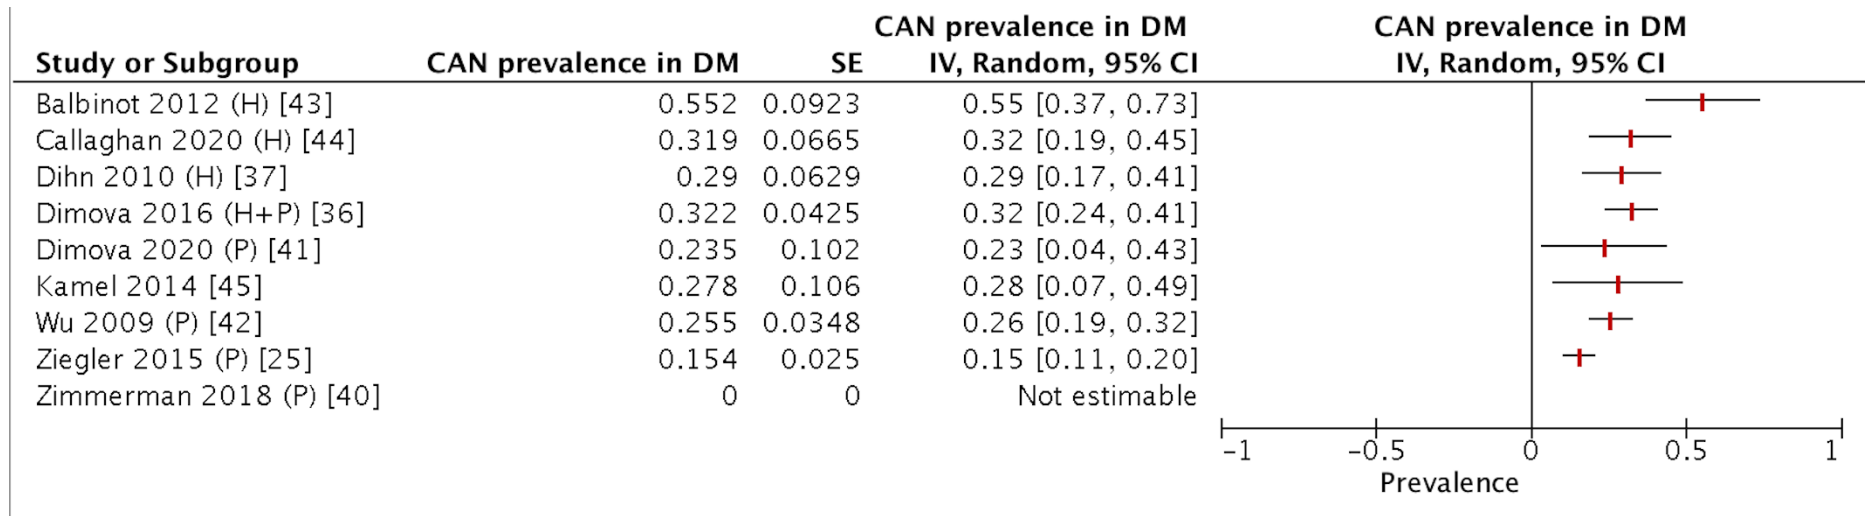

H = Hospital-based, P = Population/Primary Care-based, H+P = Both hospital and primary care based.
